# Supplementary material
Source: MDPI journal article supplement (https://www.mdpi.com/2076-3417/13/20/11206)
Supplement: s1 [file s1]

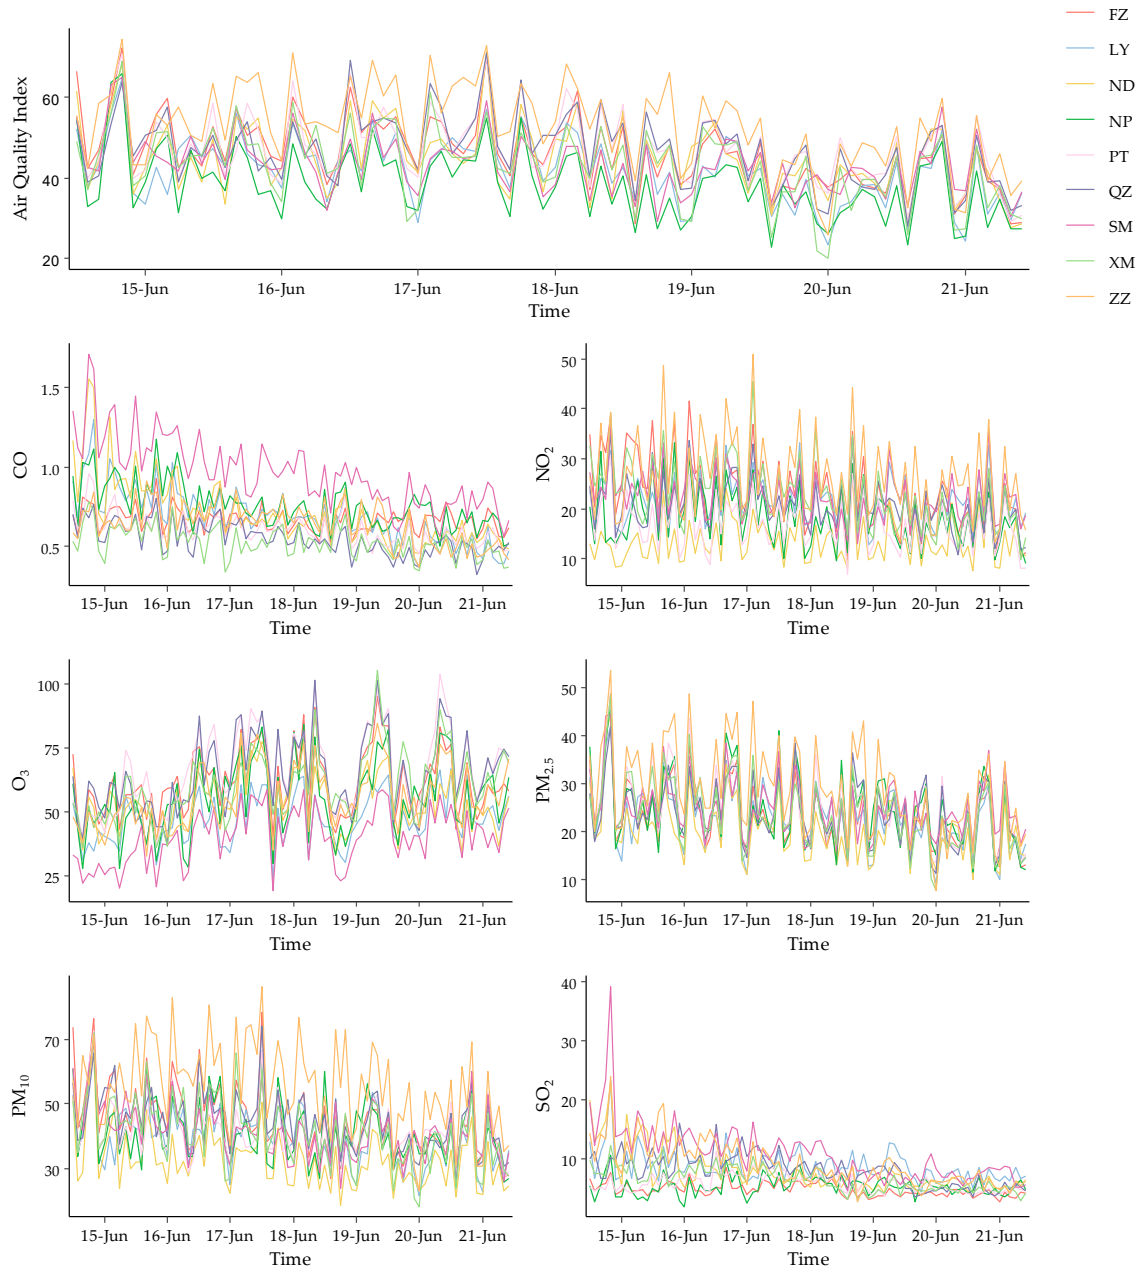

Figure S1: Change in the Air Quality Index, CO, NO<sub>2</sub>, O<sub>3</sub>, PM<sub>2.5</sub>, PM<sub>10</sub>, and SO<sub>2</sub> concentrations in Fujian Province from 1 January 2015 to 31 December 2021 (unit: mg/m<sup>3</sup>, except for CO: ug/m<sup>3</sup>).
